# Supplementary material
Source: MDPI journal article supplement (https://www.mdpi.com/2227-7102/11/10/629)
Supplement: s1 [file s1]

Archive with 1 entries (1 files):
- education-1353987-supplementary.pdf
